# Supplementary figures and images for: Intracerebral mechanisms explaining the impact of incidental feedback on mood state and risky choice
Source: eLife journal article supplement (doi:10.7554/elife.72440), 2022-07-13

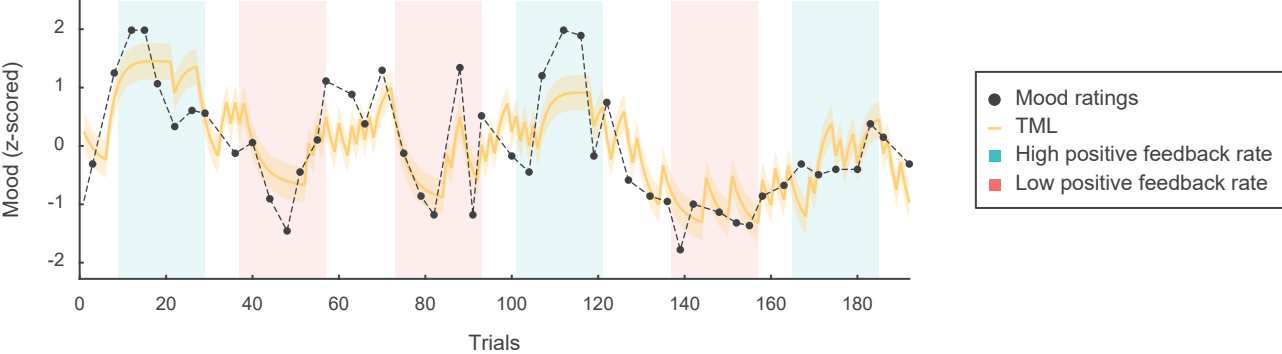

Supplement: supp [file elife_poa_e72440_Figure_1_figure_supplement_1.pdf › elife_poa_e72440_Figure_1_figure_supplement_1.pdf]

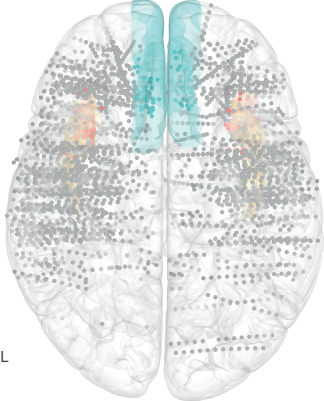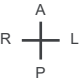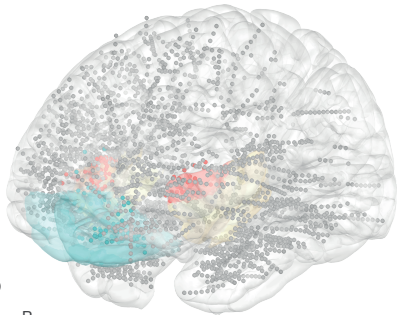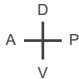

Supplement: supp [file elife_poa_e72440_Figure_2_figure_supplement_1.pdf › elife_poa_e72440_Figure_2_figure_supplement_1.pdf]
